# Supplementary material
Source: PubMed Central journal article supplement (PMC3324001)
Supplement: 1113505109_pnas.201113505SI.pdf [file 1113505109_pnas.201113505SI.pdf]

# Supporting Information

Lee et al. 10.1073/pnas.1113505109

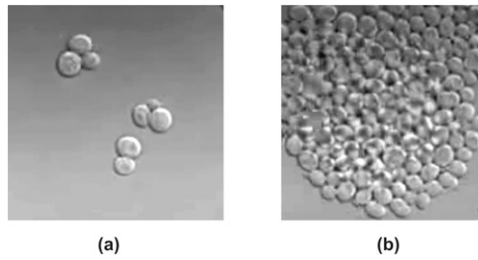

**Fig. S1.** Illustration of difficulty of long-term microscopic monitoring of mother yeast cells without bud removal. (A) Beginning. (B) After approximately six generations tracking of old mother cells is almost impossible.



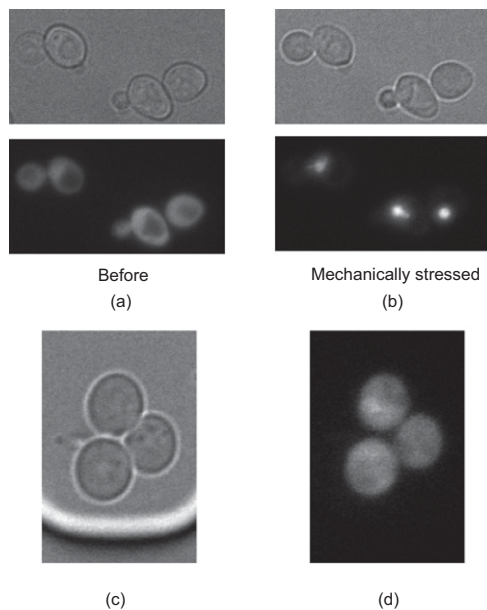

**Fig. S3.** (A) Cells between a glass slide and layer of PDMS (with a 40- $\mu$ m distance); here Msn2 is localized in the cytoplasm. (B) The same cells after applying severe external pressure on the PDMS layer; here Msn2 localizes to the nucleus indicating that Msn2 localization can indeed indicate physical stress. (C) Bright-field and (D) fluorescent images of cells under a PDMS elastic pad of our microfluidic chip, where Msn2 is localized in the cytoplasm. A potential issue with our setup could have been stress imposed on the cells by the mechanical force applied by the micropad. Generally, we did not expect the cells to be stressed because a similar type of micropad has already been used for budding yeast cells without this complication (1–3); however, we aimed to show experimentally that the setup indeed does not stress the cells. For this purpose, we used a yeast strain that had a GFP fused to the general stress-responsive transcriptional activator Msn2. Msn2 localizes to the nucleus under stress conditions (4). We found that the Msn2-GFP protein is localized in the cytoplasm of cells underneath the micropad. In a control experiment in which we manually squeezed the PDMS pad and thus the cell, the fusion protein localized to the nucleus, indicating that during regular operation of the chip, the cells are not stressed.

1. Cookson S, Ostroff N, Pang WL, Volfson D, Hasty J (2005) Monitoring dynamics of single-cell gene expression over multiple cell cycles. *Mol Syst Biol* 1:2005.0024.
2. Lee PJ, Helman NC, Lim WA, Hung PJ (2008) A microfluidic system for dynamic yeast cell imaging. *Biotechniques* 44:91–95.
3. Dechant R, et al. (2010) Cytosolic pH is a second messenger for glucose and regulates the PKA pathway through V-ATPase. *EMBO J* 29:2515–2526.
4. Schmitt AP, McEntee K (1996) Msn2p, a zinc finger DNA-binding protein, is the transcriptional activator of the multistress response in *Saccharomyces cerevisiae*. *Proc Natl Acad Sci USA* 93:5777–5782.

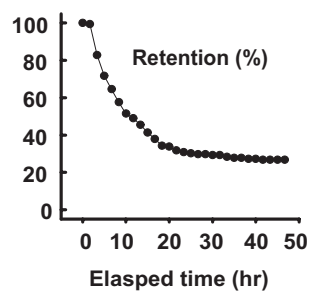

**Fig. S4.** Retention of cells under micropad. The plot shows the percentage of retained cells as a function of the elapsed experimental time.



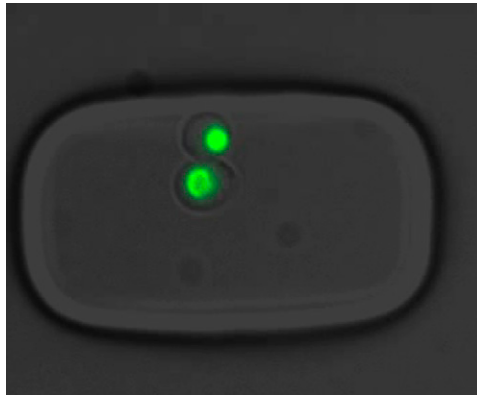

**Movie S1.** Example of microfluidic dissection. This movie shows a lifespan of a yeast cell, which produced 28 buds and died. Through the prealigned single focal plane of the microfluidic dissection platform, age-associated morphological phenotypes can be observed: cell and vacuole sizes (visualized by Vph1p-GFP) gradually become larger and ellipsoidal daughter cells are produced.

[Movie S1](#)

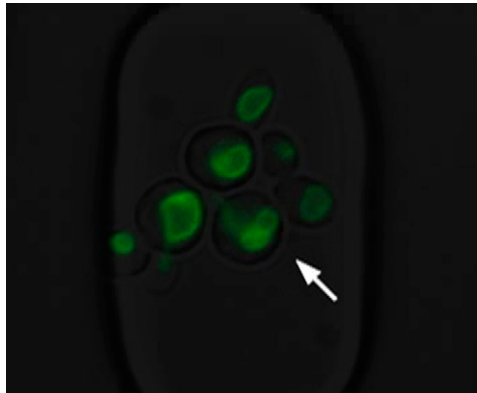

**Movie S2.** Example of large daughter cell. Sometimes daughter cells of old mothers were found to be bigger than mother cells. Arrows point out old mother cells: The one with the white arrow had produced 20 buds, and the one with the yellow arrow had produced 22 buds. Cells expressing Vph1p-GFP served for visualizing vacuoles.

[Movie S2](#)

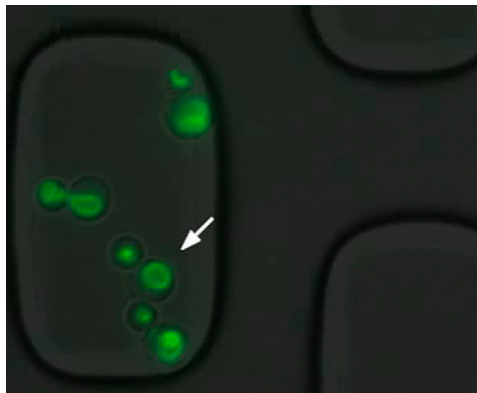

**Movie S3.** Example of ellipsoidal (pseudohyphae)-type death pattern. The cell pointed out by the arrow shows an example of ellipsoidal death pattern. It had produced 23 buds. Cells expressing Vph1p-GFP served for visualizing vacuoles.

[Movie S3](#)

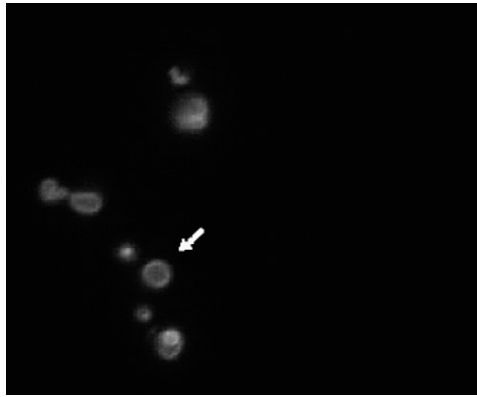

**Movie S4.** Same movie as [Movie S3](#), showing only the fluorescence channel. The vacuole pointed out by arrows belongs to the same as indicated in [Movie S3](#). The vacuole size gradually becomes larger; at some point it fails to complete the fusion processes after cell division and a fragmented vacuolar structure can be observed. Cells expressing Vph1p-GFP served for visualizing vacuoles.

[Movie S4](#)

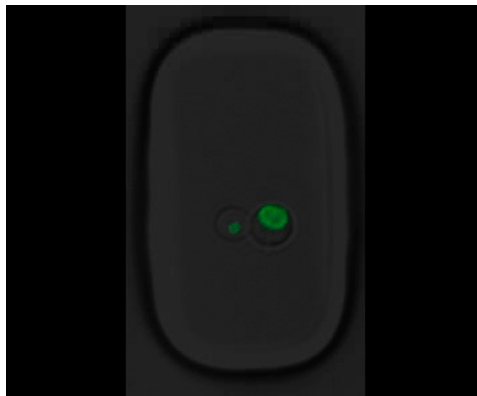

**Movie S5.** Example of spherical-type death pattern. In the movie, the cell produced 14 buds and died without significant cell morphology change. A ruptured-like vacuole was observed at the end of the cell's life. Cells expressing Vph1p-GFP served for visualizing vacuoles.

[Movie S5](#)
